# Supplementary material for: Anti-Irritant and Anti-Inflammatory Effects of DHA Encapsulated in Resveratrol-Based Solid Lipid Nanoparticles in Human Keratinocytes
Source: PubMed Central journal article supplement (PMC6627705; doi:10.3390/nu11061400), 2019-06-21
Supplement: nutrients-11-01400-s001.pdf [file nutrients-11-01400-s001.pdf]

### HaCaT

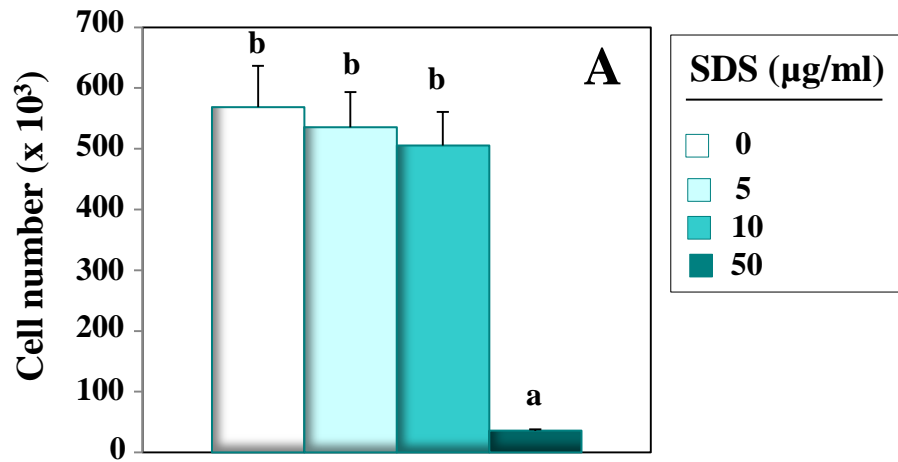

### NCTC 2544

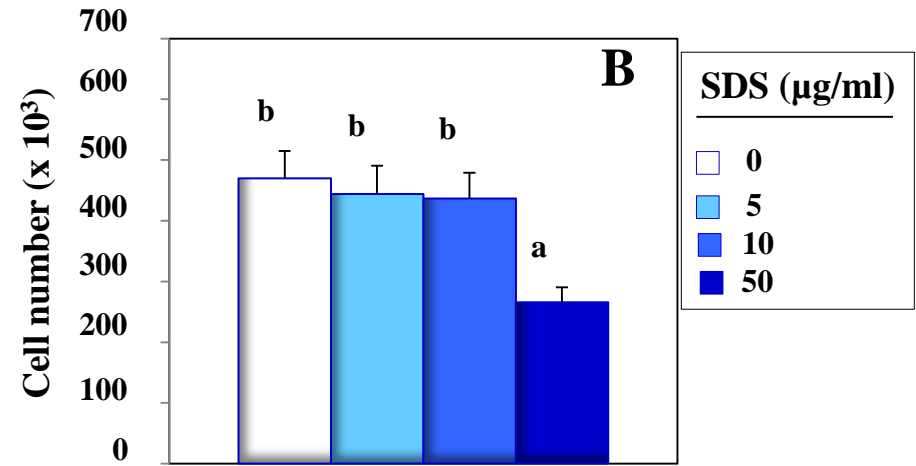

Supplementary Figure 1

# HaCaT

**A**

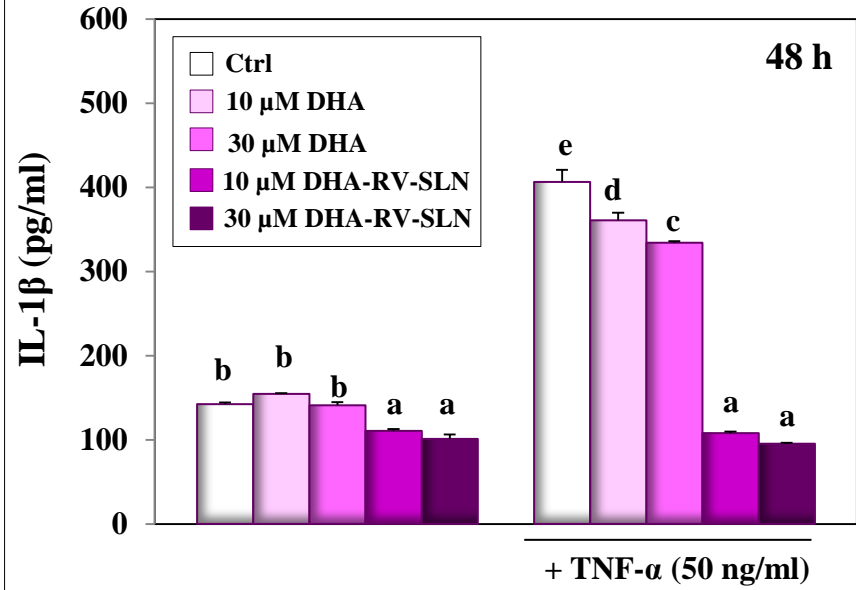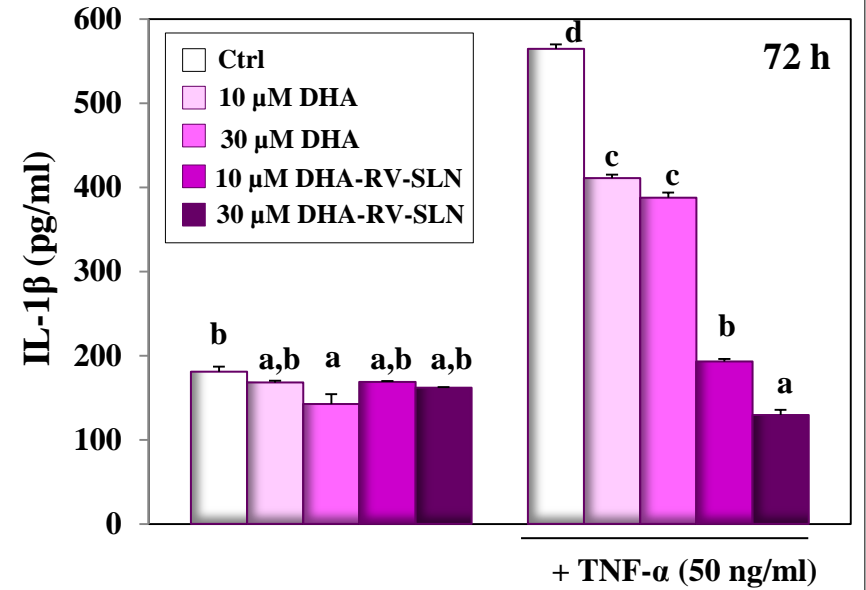

# NCTC 2544

**B**

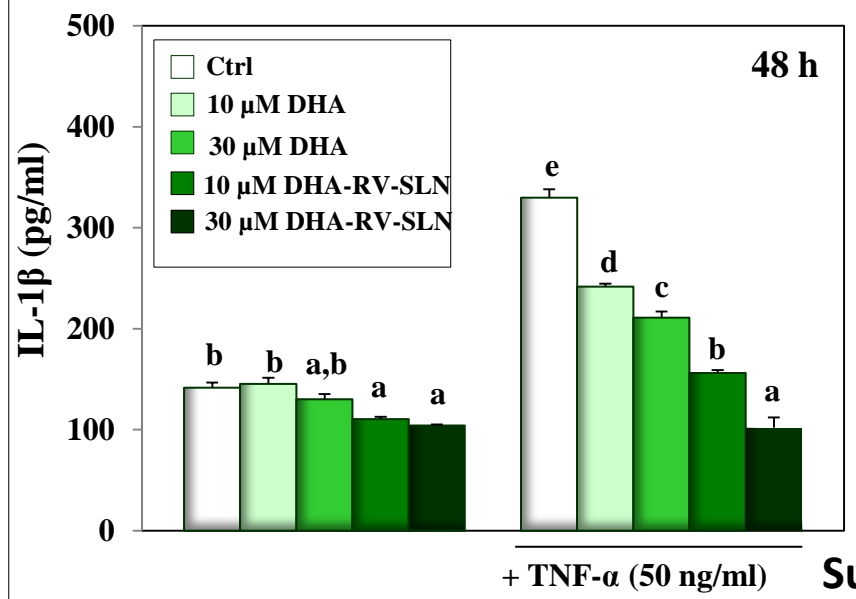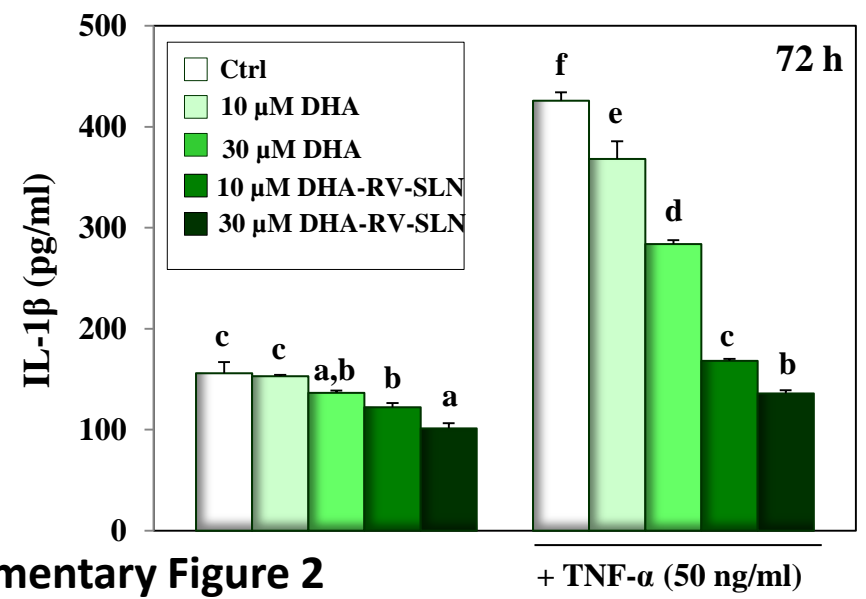

**Supplementary Figure 2**

# HaCaT

**A**

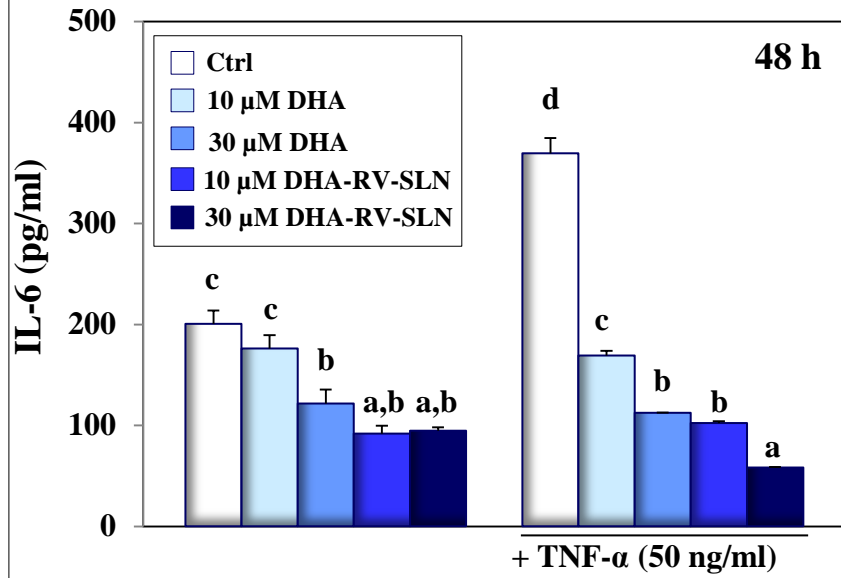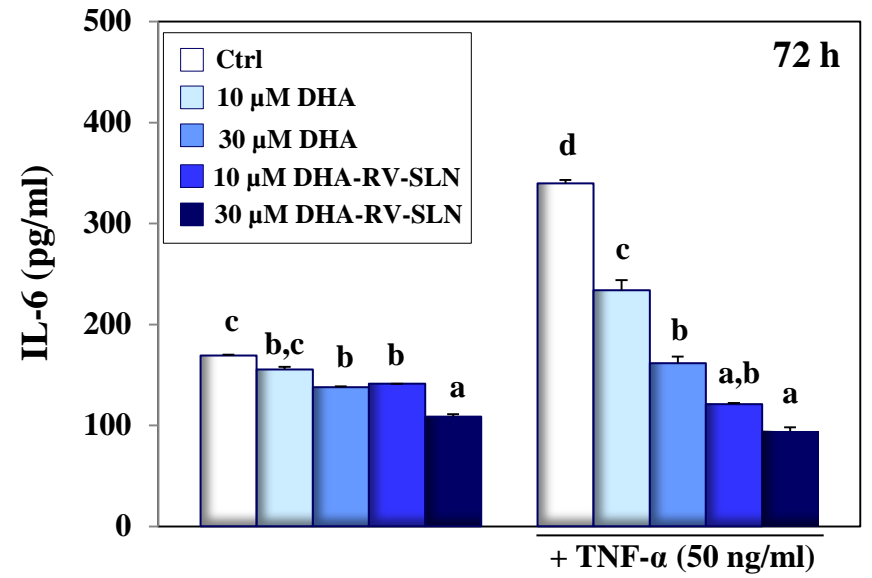

# NCTC 2544

**B**

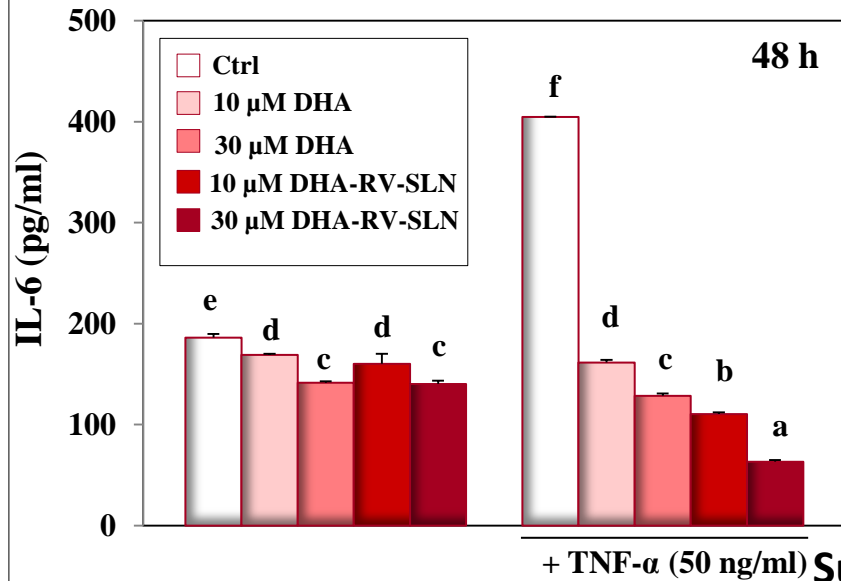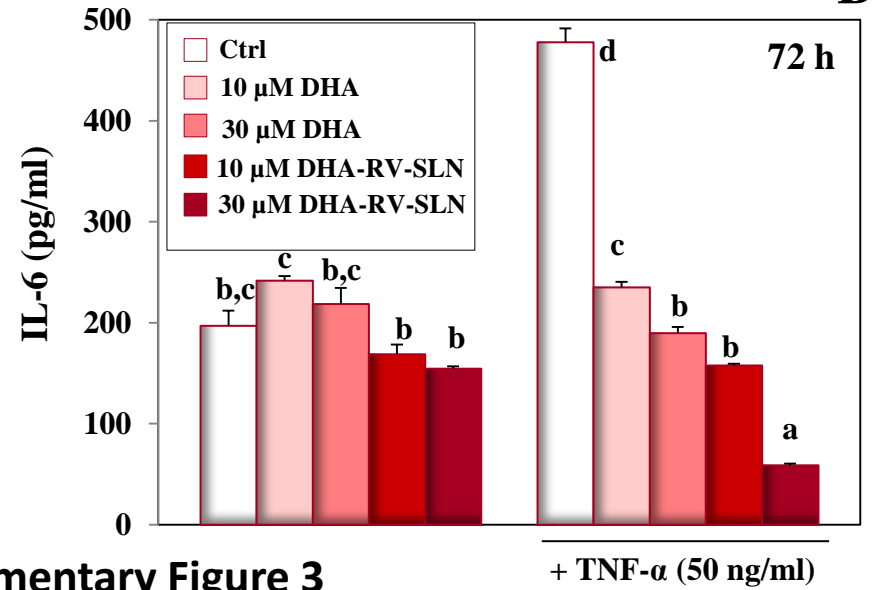

# HaCaT

**A**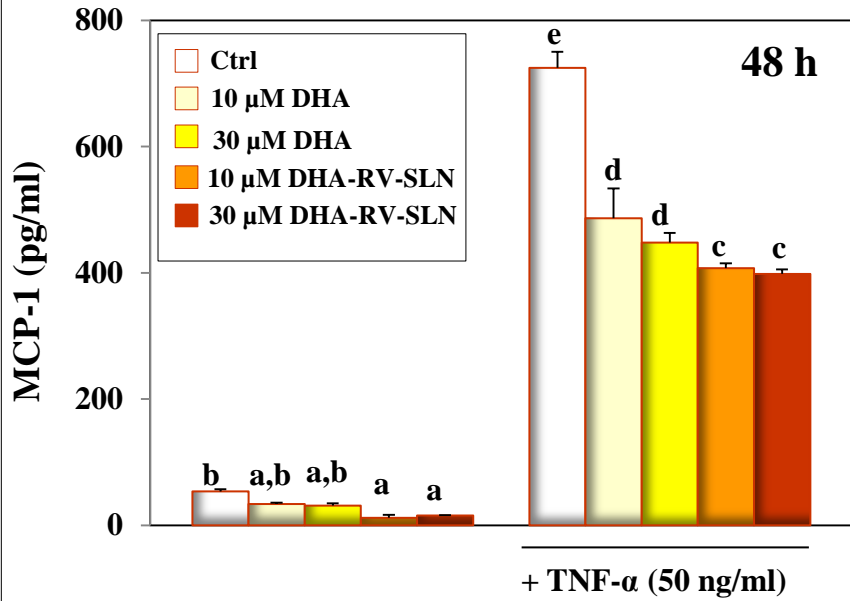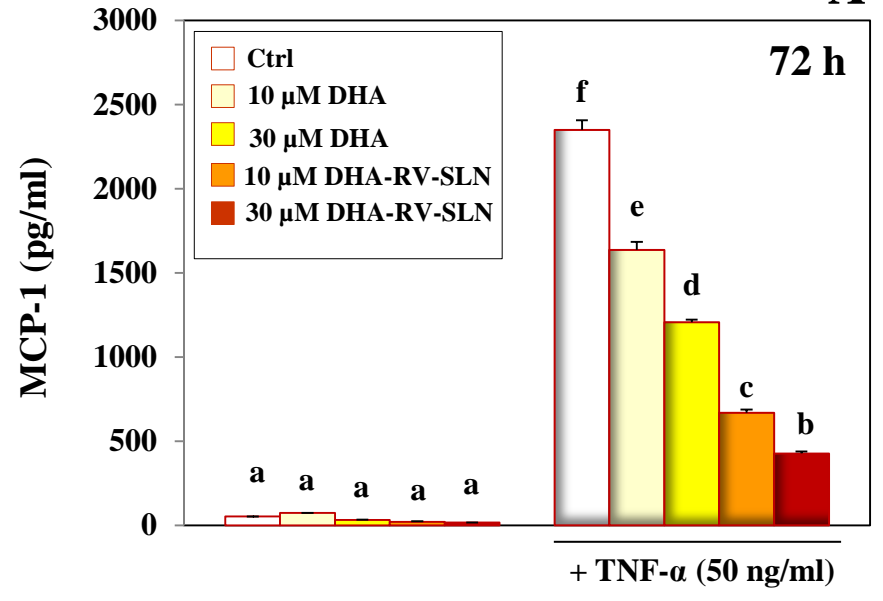

# NCTC 2544

**B**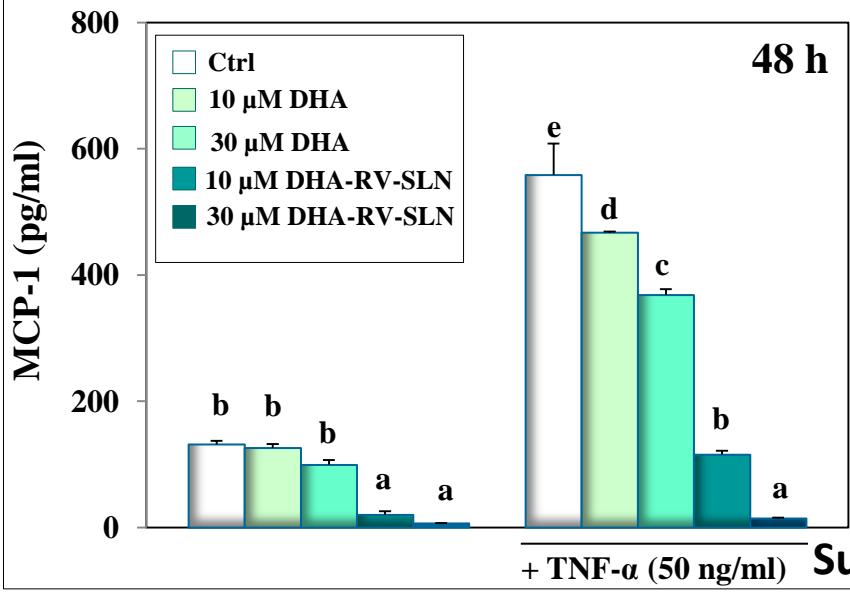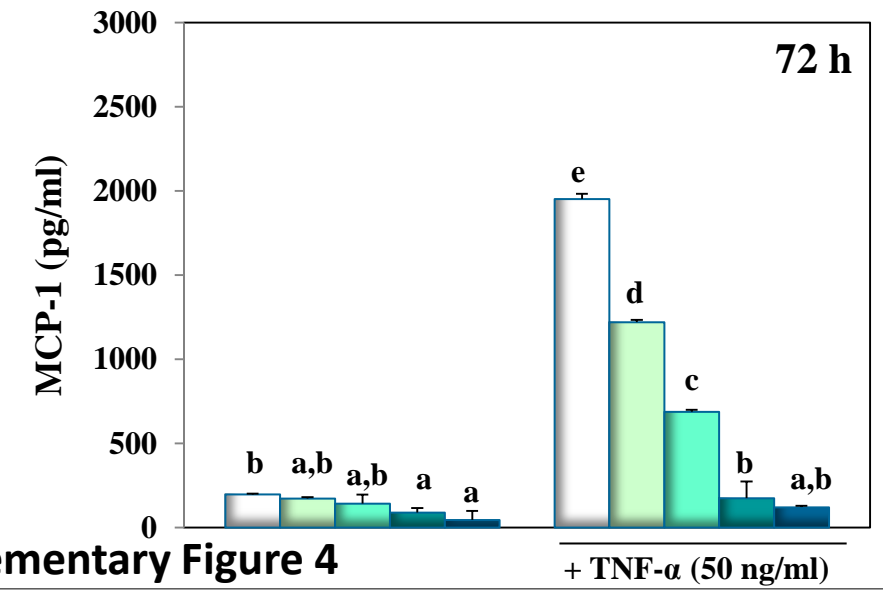**Supplementary Figure 4**
